# Supplementary material
Source: Springer Nature journal article supplement (https://www.springermedizin.de/resource/supplementary/12913_2012_2398_MOESM3_ESM.pdf/9530546)

**Technical systems of work**

**Recursive requirements of resources**

**Approaches to work**

**Functions of dispensing**

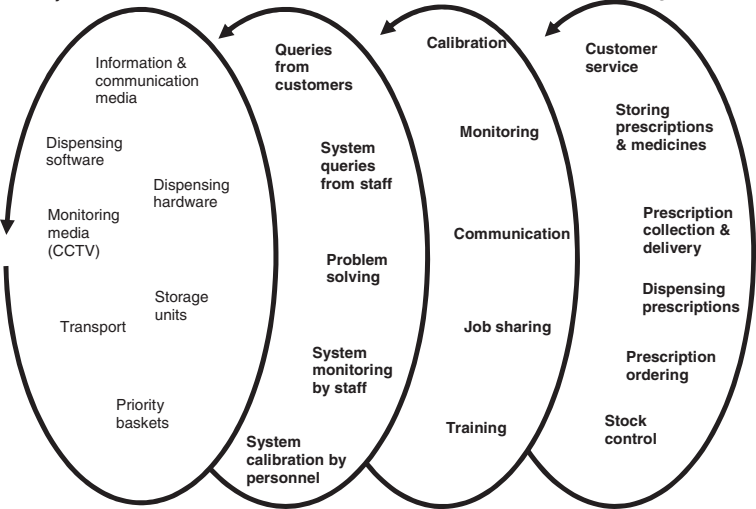

Supplement: MOESM3 [file 9530546]
